# Supplementary material
Source: publisher figshare collection journal article supplement (https://acs.figshare.com/ndownloader/files/4688398)
Supplement: Supplementary file 1 [file 4688398]

## Supporting Information

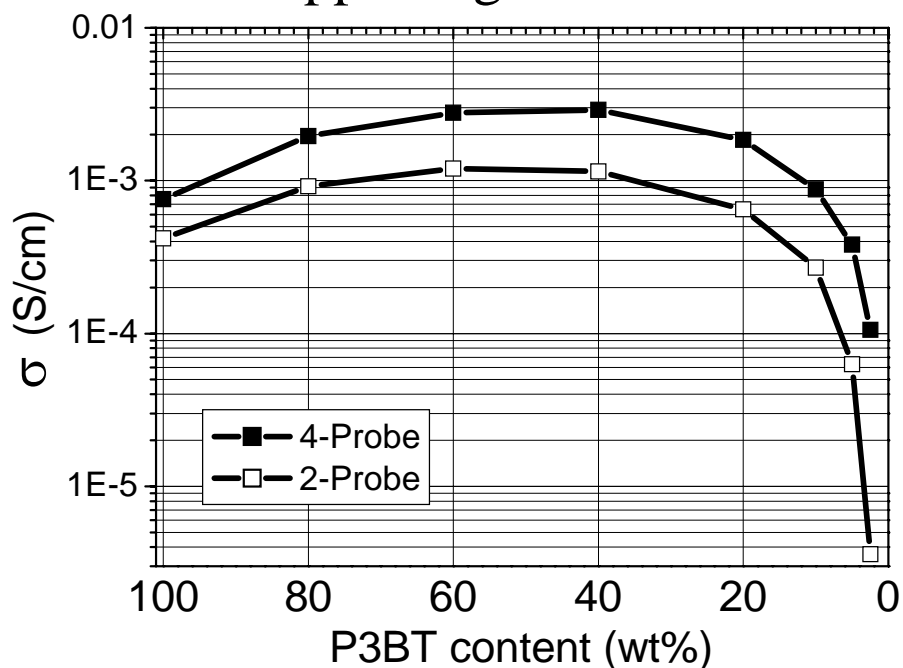

**Figure S1.** Dependence of P3BT/PMMA conductivity on P3BT content in the composites as measured with 4-probe method (solid square) and 2-probe method (open square), respectively.

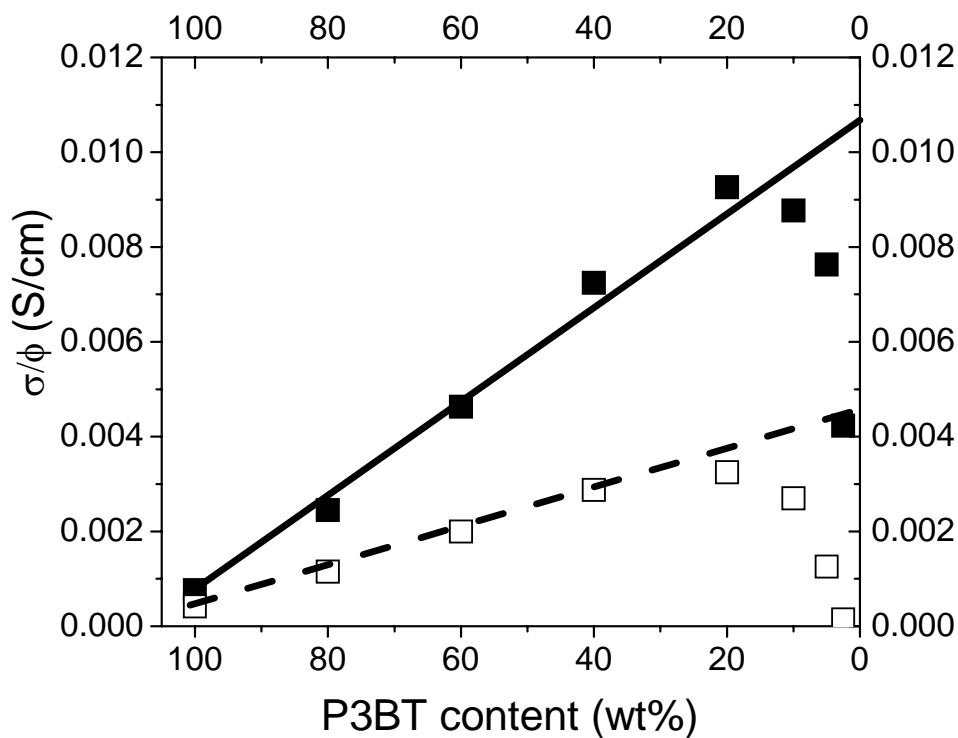

**Figure S2.** Dependence of  $\sigma/\phi$  of P3BT/PMMA composite on P3BT content ( $\phi$ ) in the composites as measured with 4-probe method (solid square) and 2-probe method (open square), respectively.

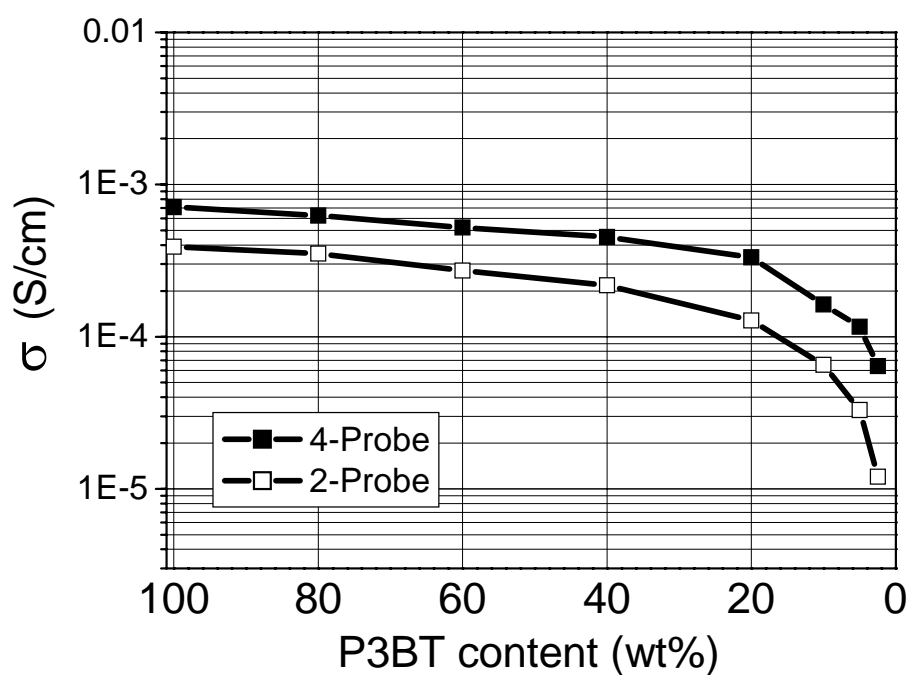

**Figure S3.** Dependence of P3BT/regionrandom P3HT (RRa-P3HT) conductivity on P3BT content in the composites as measured with 4-probe method (solid square) and 2-probe method (open square), respectively.
